# 1 **Multivariate genome-wide association analysis of a cytokine** 2 **network reveals variants with widespread immune,** 3 **haematological and cardiometabolic pleiotropy**

4  
5 Artika P. Nath<sup>1,2,3,\*</sup>, Scott C. Ritchie<sup>1,2</sup>, Nastasiya F. Grinberg<sup>4</sup>, Howard Ho-Fung Tang<sup>1</sup>, Qin  
6 Qin Huang<sup>1,5</sup>, Shu Mei Teo<sup>1,2</sup>, Ari V. Ahola-Olli<sup>6,7,8</sup>, Peter Würtz<sup>9,10</sup>, Aki S. Havulinna<sup>8,11</sup>,  
7 Kristiina Aalto<sup>12</sup>, Niina Pitkänen<sup>6</sup>, Terho Lehtimäki<sup>13</sup>, Mika Kähönen<sup>14</sup>, Leo-Pekka  
8 Lyytikäinen<sup>13</sup>, Emma Raitoharju<sup>13</sup>, Ilkka Seppälä<sup>13</sup>, Antti-Pekka Sarin<sup>8,11</sup>, Samuli Ripatti<sup>8,15,16</sup>,  
9 Aarno Palotie<sup>8,16,17,18,19</sup>, Markus Perola<sup>8,11</sup>, Jorma S Viikari<sup>20</sup>, Sirpa Jalkanen<sup>12</sup>, Mikael  
10 Maksimow<sup>12</sup>, Marko Salmi<sup>20</sup>, Chris Wallace<sup>4,22</sup>, Olli T. Raitakari<sup>6,23</sup>, Veikko Salomaa<sup>11</sup>, Gad  
11 Abraham<sup>1,2,5</sup>, Johannes Kettunen<sup>11,24,25,26</sup>, Michael Inouye<sup>1,2,3,5,27,\*</sup>

12  
13 <sup>1</sup>Cambridge Baker Systems Genomics Initiative, Baker Heart and Diabetes Institute, Melbourne, Victoria 3004,  
14 Australia

15 <sup>2</sup>Cambridge Baker Systems Genomics Initiative, Department of Public Health and Primary Care, University of  
16 Cambridge, Cambridge CB1 8RN, United Kingdom

17 <sup>3</sup>Department of Microbiology and Immunology, University of Melbourne, Parkville, Victoria 3010, Australia

18 <sup>4</sup>Department of Medicine, University of Cambridge, Addenbrooke's Hospital, Cambridge CB2 0SP, United  
19 Kingdom

20 <sup>5</sup>Department of Clinical Pathology, University of Melbourne, Parkville, VIC 3010, Australia

21 <sup>6</sup>Research Centre of Applied and Preventive Cardiovascular Medicine, University of Turku, Turku 20520,  
22 Finland

23 <sup>7</sup>Satasairaala, Department of Internal Medicine, 28500 Pori, Finland

24 <sup>8</sup>Institute for Molecular Medicine Finland, University of Helsinki, Helsinki 00014, Finland

25 <sup>9</sup>Research Programs Unit, Diabetes and Obesity, University of Helsinki, Helsinki 00290, Finland

26 <sup>10</sup>Nightingale Health Ltd, Helsinki 00300, Finland

27 <sup>11</sup>National Institute of Health and Welfare, Helsinki 00271, Finland

28 <sup>12</sup>Medicity Research Laboratory, Department of Medical Microbiology and Immunology, University of Turku,  
29 Turku 20520, Finland

30 <sup>13</sup>Department of Clinical Chemistry, Fimlab Laboratories, and Finnish Cardiovascular Research Center -  
31 Tampere, Faculty of Medicine and Health Technology, Tampere University, Tampere 33520, Finland

32 <sup>14</sup>Department of Clinical Physiology, Tampere University Hospital, and Finnish Cardiovascular Research  
33 Center - Tampere, Faculty of Medicine and Health Technology, Tampere University, Tampere 33521, Finland

34 <sup>15</sup>Department of Public Health, University of Helsinki, Helsinki 00014, Finland

35 <sup>16</sup>Broad Institute of MIT and Harvard, Cambridge, Massachusetts 02142, USA

36 <sup>17</sup>Analytic and Translational Genetics Unit, Massachusetts General Hospital, Harvard Medical School, Boston,  
37 Massachusetts 02114, USA

38 <sup>18</sup>Department of Psychiatry, Massachusetts General Hospital, Boston, Massachusetts 02114, USA

39 <sup>19</sup>Department of Neurology, Massachusetts General Hospital, Boston, Massachusetts 02114, USA

40 <sup>20</sup>Department of Medicine, University of Turku and Division of Medicine, Turku University Hospital, Turku  
41 20520, Finland

42 <sup>21</sup>Medicity Research Laboratory and Institute of Biomedicine, University of Turku, Turku 20520, Finland

43 <sup>22</sup>MRC Biostatistics Unit, Institute of Public Health, Cambridge CB2 0SR, United Kingdom

44 <sup>23</sup>The Department of Clinical Physiology and Nuclear Medicine, Turku University Hospital, Turku 20520,  
45 Finland

46 <sup>24</sup>Computational Medicine, Centre for Life Course Health Research, University of Oulu, Oulu 90014, Finland

47 <sup>25</sup>NMR Metabolomics Laboratory, School of Pharmacy, University of Eastern Finland, Kuopio 70211, Finland

48 <sup>26</sup>Biocenter Oulu, University of Oulu 90014, Finland

49 <sup>27</sup>The Alan Turing Institute, London, United Kingdom

50  
51  
52 \* Correspondence addressed to M.I. (mi336@medschl.cam.ac.uk) or A.P.N. (artika.nath@baker.edu.au)

53

54 **Abstract**

55

56 Cytokines are essential regulatory components of the immune system and their aberrant levels  
57 have been linked to many disease states. Despite increasing evidence that cytokines operate in  
58 concert, many of the physiological interactions between cytokines, and the shared genetic  
59 architecture that underlie them, remain unknown. Here we aimed to identify and characterise  
60 genetic variants with pleiotropic effects on cytokines – to do this we performed a multivariate  
61 genome-wide association study on a correlation network of 11 circulating cytokines measured  
62 in 9,263 individuals. Meta-analysis identified a total of 8 loci significantly associated with the  
63 cytokine network, of which two (*PDGFRB* and *ABO*) had not been detected previously.  
64 Bayesian colocalisation analysis revealed shared causal variants between the eight cytokine  
65 loci and other traits; in particular, cytokine network variants at the *ABO*, *SERPINE2*, and  
66 *ZFPM2* loci showed pleiotropic effects on the production of immune-related proteins; on  
67 metabolic traits such as lipoprotein and lipid levels; on blood-cell related traits such as platelet  
68 count; and on disease traits such as coronary artery disease and type 2 diabetes.

## 69 Introduction

70 Cytokines are signalling molecules secreted by cells that are central to multiple physiological  
71 functions, especially immune regulation (1). Broadly-speaking, cytokines include chemokines  
72 that drive movement of cells, and growth factors that drive cell growth and proliferation.  
73 Changes in circulating cytokine levels have been associated with infection (2), autoimmune  
74 diseases (3), malignancies (4), as well as atherosclerosis and cardiovascular disease (5,6). The  
75 expression of cytokines can be strongly regulated by genetic variation (7), and several studies  
76 have identified cis-acting genetic variants associated with circulating levels of certain  
77 cytokines and their receptors under various conditions (8–10). These initial studies laid the  
78 foundation for genetic investigation of circulating cytokine levels at a scale and breadth that  
79 may improve our understanding of individual differences in immune response, inflammation,  
80 infection and common disease susceptibility.

81  
82 Despite cytokines operating in concert to facilitate immune regulation, genome-wide  
83 association studies (GWAS) have typically focused on individual cytokines (11–18). The most  
84 extensive cytokine GWAS to date separately analysed individual levels of 41 circulating  
85 cytokines in approximately 8,000 individuals, identifying 27 distinct loci each associated with  
86 at least one cytokine (19). Others have identified loci influencing cytokine production in  
87 response to pathogens (20,21). While these previous GWAS utilised a univariate framework,  
88 analysing each cytokine separately, studies of related traits indicate a multivariate framework  
89 can confer greater statistical power, for example by taking advantage of the tightly co-regulated  
90 nature of both pro and anti-inflammatory cytokines.

91  
92 Several methods for multivariate GWAS of correlated phenotypes have been developed (22–  
93 27). Simulations have shown that multivariate analysis can result in increased power to detect  
94 genetic associations with small or pleiotropic effects across phenotypes (22,28–30). These have  
95 largely been conducted on metabolic traits where they have demonstrated a boost in statistical  
96 power. For example, multivariate analysis of four lipid traits led to a 21% increase in  
97 independent genome-wide significant variants compared to univariate analysis (23). Similar  
98 findings were shown for other metabolic traits (24,31). Moreover, complex genotype-  
99 phenotype dependencies have been revealed when jointly testing rare variants with lipoprotein  
100 traits (32). Notably, a multivariate GWAS of networks of highly correlated serum metabolites  
101 was able to detect nearly twice the number of loci compared to univariate testing, with

102 downstream tissue-specific transcriptional analyses showing that the top candidate genes from  
103 multivariate analysis were upregulated in atherosclerotic plaques (31).

104

105 In this study, we focus on correlated immune traits by leveraging the correlation structure  
106 within a network of 11 cytokines to perform a multivariate genome-wide scan in 9,263  
107 individuals from three population-based cohorts. We then investigate the colocalisation of  
108 cytokine-associated variants with those regulating gene expression in numerous tissues and  
109 cell types, circulating protein and metabolite levels, haematological traits, and disease states.  
110 Finally, we highlight and characterise variants as potential master regulator of the cytokine  
111 network, with pleiotropic effects on production of inflammatory proteins, immune cell  
112 function, lipoprotein and lipid levels, and cardiometabolic diseases.

113

114

115

116

117

## 118 **Methods**

### 119 **Study populations**

120 Approval for the study protocols for each cohort was obtained from their respective ethics  
121 committees, and all subjects enrolled in the study gave written informed consent.

122

123 The Cardiovascular Risk in Young Finns Study (YFS) is a longitudinal prospective cohort  
124 study commenced in 1980, with follow-up studies carried out every 3 years. The purpose of  
125 this study was to monitor the risk factors of cardiovascular disease in children and adolescents  
126 from different regions of Finland. In the baseline study, conducted in five Finnish metropolitan  
127 areas (Turku, Helsinki, Kuopio, Tampere and Oulu), a total of 3,596 children and adolescents  
128 were randomly selected from the national public register, the details of which were described  
129 in (33). A total of 2,204 participants responded to the 2007 follow-up study (YFS07), for which  
130 the age range was 30-45 years. Ethics were approved by the Joint Commission on Ethics of the  
131 Turku University and the Turku University Central Hospital.

132

133 The FINRISK cohorts were part of a cross-sectional population-based survey, which are  
134 carried out every five years since 1972 to evaluate the risk factors of chronic diseases in the  
135 Finnish population (34). Each survey has recruited a representative random sample of 6,000-

136 8,800 individuals, within the age group of 25-74 years, chosen from the national population  
137 information system. This study utilised samples from the 1997 (FINRISK97) and 2002  
138 (FINRISK02) collections, which recruited individuals from five or six (for FINRISK02) major  
139 regional and metropolitan areas of Finland: the provinces of North Karelia, Northern Savo,  
140 Northern Ostrobothnia, Kainuu, and Lapland; the Turku and Loimaa region of south-western  
141 Finland; and the Helsinki and Vantaa metropolitan area. In total, 8,444 (aged 24-74 years) and  
142 8,798 (aged 51-74 years) individuals participated in the FINRISK97 and FINRISK02 studies,  
143 respectively. Importantly, each FINRISK survey is an independent cohort, each comprising a  
144 different set of participants. Ethics were approved by the coordinating ethical committee of the  
145 Helsinki and Uusimaa hospital district, Finland.

146

### 147 **Blood sample collection**

148 Blood samples and detailed information on various physical and clinical variables for the YFS  
149 and FINRISK cohorts were collected using similar protocols as described previously (33,34).  
150 Venous blood was collected following an overnight fast for the YFS cohorts, while non-fasting  
151 blood was collected for FINRISK. Samples were centrifuged, and the resulting plasma and  
152 serum samples were aliquoted into separate tubes and stored at -70°C for later analyses.

153

### 154 **Genotype processing and quality control**

155 Genotyping in YFS and FINRISK cohorts was performed on whole blood genomic DNA. For  
156 YFS07 (N=2,442), a custom 670K Illumina BeadChip array was used for genotyping. For  
157 FINRISK97 (N=5,798), the Human670-QuadCustom Illumina BeadChip platform was used  
158 for genotyping. For FINRISK02 (N=5,988), the Human670-QuadCustom Illumina BeadChip  
159 (N=2,447) and the Illumina Human CoreExome BeadChip (N=3,541) was used for genotyping.  
160 The Illuminus clustering algorithm was used for genotype calling (35) and quality control (QC)  
161 was performed using the Sanger genotyping QC pipeline. This included removing SNPs and  
162 samples with > 5% genotype missingness followed by removal of samples with gender  
163 discrepancies. Genotypes were then imputed with IMPUTE2 (36) using the 1000 Genomes  
164 Phase 1 version 3 as the reference panel followed by removal of SNPs with call rate < 95%,  
165 imputation “info” score < 0.4, minor allele frequency < 1%, and Hardy-Weinberg equilibrium  
166  $P$ -value <  $5 \times 10^{-6}$ . Instances where data was generated using different genotyping platforms,  
167 overlapping SNPs were merged using PLINK version 1.90 software ([https://www.cog-](https://www.cog-genomics.org/plink2)  
168 [genomics.org/plink2](https://www.cog-genomics.org/plink2)) (37). A total of 6,664,959, 7,370,592 and 6,639,681 genotyped and  
169 imputed SNPs passed quality control in YFS, FINRISK97 and FINRISK02, respectively.

170 Cryptic relatedness was assessed using identity by descent (IBD) estimates and in cases where  
171 the pi-hat relatedness was greater than 0.1, one of the two individuals was randomly removed  
172 (N=44 for YFS, N=291 for FINRISK97, and N=39 for FINRISK02). Genetic PCs were  
173 obtained through principal component analysis (PCA) using FlashPCA (38) on ~60,000 LD  
174 pruned SNPs.

175

## 176 **Measurement of cytokines**

177 Concentrations of cytokines, chemokines, and growth factors (hereafter referred to as  
178 cytokines) were measured in serum (YFS07), EDTA plasma (FINRISK97), and heparin plasma  
179 (FINRISK02) using multiplex fluorescent bead-based immunoassays (Bio-Rad). A total of 48  
180 cytokines were measured in YFS07 (N=2,200) and FINRSK02 (N=2,775) using two  
181 complementary array systems: the Bio-Plex Pro™ Human Cytokine 27-plex assay and Bio-  
182 Plex Pro™ Human Cytokine 21-plex assay. For FINRISK97, 19 cytokines were assayed on  
183 the Human Cytokine 21-plex assay system. All assays were performed in accordance with the  
184 manufacturer's instructions, except that the amount of beads, detection antibodies, and  
185 streptavidin-phycoerythrin conjugate were used at half their recommended concentration.  
186 Fluorescence intensity values determined using the Bio-Rad's Bio-Plex 200 array reader were  
187 converted to concentrations from the standard curve generated by the Bio-Plex™ Manager 6.0  
188 software. For each cytokine, a standard curve was derived by fitting a five-parameter logistic  
189 regression model to the curve obtained from standards provided by the manufacturer.  
190 Cytokines with concentrations at the lower and upper asymptotes of the sigmoidal standard  
191 curve were set to the concentration corresponding to the fluorescent intensity 2% above or  
192 below the respective asymptotes.

193

## 194 **Cytokine data filtering, normalisation and clustering**

195 The analysis was limited to 18 cytokines (**Table S1**) assayed in all three cohorts. Although  
196 Interleukin 1 receptor, type I (IL-1Ra) was assayed in all three cohorts, it was excluded from  
197 the analyses due to its inconsistent Pearson correlation pattern with other 18 cytokines across  
198 the three datasets.

199

200 Before normalisation, cytokine data was subset to individuals with matched genotype data in  
201 YFS07 (N=2,018), FINRISK97 (N=5,728), and FINRISK02 (N=2,775). We excluded  
202 individuals in YFS07 reporting febrile infection in the two weeks prior to blood sampling  
203 (N=92). To identify extreme outlier samples, PCA was performed on the log<sub>2</sub> transformed

204 cytokine values using the missMDA R package (39). This method first imputed the missing  
205 cytokine values using a regularised iterative PCA algorithm implemented in the imputePCA  
206 function, before performing PCA. Three and two outlier samples were removed from  
207 FINRISK97 and FINRISK02 respectively. Based on IBD analysis described above, 44  
208 (YFS07), 291 (FINRISK97), and 39 (FINRISK02) individuals were also removed. After  
209 filtering, a total of 1,843, 5,434 and 1,986 individuals passed quality control in YFS07,  
210 FINRISK97 and FINRISK02, respectively, and these were used for downstream analysis.

211  
212 Since all 18 cytokines displayed non-Gaussian distributions, we performed normalisation of  
213 cytokine levels. For YFS07, the lower limit of detection (LOD) was available for each  
214 cytokine. Reported values that were below the LOD were indistinguishable from background  
215 noise signals or instrument error (40), and were excluded and treated as missing. For  
216 FINRISK97 and FINRISK02, the detection limits were not available; however, it was observed  
217 that these two datasets exhibited a bimodal distribution, with the leftmost peak below the  
218 expected LOD when compared to the YFS dataset. Individuals in the leftmost peak were  
219 therefore set to missing. The log<sub>2</sub>-transformed cytokine values were then normalised to follow  
220 standard Gaussian distributions (with mean of 0 and sd of 1) using rank-based inverse normal  
221 transformation (rntransform) as implemented in the GenABEL R package (41). For each study  
222 group, residuals for all cytokines were calculated by regressing the normalised cytokine values  
223 on age, sex, BMI, lipid and blood pressure medication, pregnancy status (FINRISK97), and  
224 the first 10 genetic PCs using a multiple linear regression model.

225  
226 Detection of groups of correlated cytokines was done in FINRISK97, the cohort with the  
227 largest sample size. Pairwise Pearson correlation was performed amongst residuals of 18  
228 cytokines. These cytokines were then subjected to hierarchical clustering, with one minus the  
229 absolute correlation coefficient used as the dissimilarity metric. We then defined a cytokine  
230 network – a group of 11 cytokines that were moderate- to highly-correlated ( $r > 0.57$ ) – for  
231 subsequent use in the multivariate analysis.

232

## 233 **Statistical Analysis**

234 Univariate association analysis was carried out with linear regression in PLINK (37), where  
235 the residuals of each cytokine were regressed on each SNP genotypes. Summary statistics at  
236 each marker across three datasets were then combined in a meta-analysis using the METAL  
237 software program (42), which implemented a weighted Z-score method.

238

239 Multivariate testing (MV) was performed under the canonical correlation framework  
240 implemented in PLINK (MV-PLINK) (22), which extracted the linear combination of traits  
241 most highly-correlated with genotypes at a particular SNP. The test is based on Wilks' Lambda  
242 ( $\lambda = 1 - \rho^2$ ), where  $\rho$  is the canonical correlation coefficient between the SNP and the cytokine  
243 network. Corresponding *P*-values were computed by transforming Wilks' Lambda to a statistic  
244 that approximates an *F* distribution and the loadings for each cytokine represented their  
245 individual contributions toward the multivariate association result (22). Since the multivariate  
246 beta-coefficients and standard errors were not calculated by MV-PLINK, the cohort-level  
247 multivariate *P*-values were combined in a meta-analysis using the weighted Z-score method  
248 (43,44) implemented in the metap R package. Briefly, the *P*-values for each dataset were  
249 transformed into Z-scores, weighted by their respective sample sizes and the sum of these  
250 weighted Z-scores were then divided by the square root of the sum of squares of the sample  
251 size for each study. The combined weighted Z-score obtained was back-transformed into a one-  
252 tailed *P*-value.

253

254 To assess the inflation of the test statistics as a result of population structure, quantile-quantile  
255 (Q-Q) plots of observed vs. expected- $\log_{10}$  *P*-values were generated from the multivariate  
256 analysis of the three datasets, both individually and meta-analysed. Corresponding genomic  
257 inflation factor ( $\lambda$ ) was calculated by taking the ratio of the median observed distribution of *P*-  
258 values to the expected median.

259

260 To investigate the existence of additional independent signals within the significant  
261 multivariate loci, a conditional stepwise multivariate meta-analysis was performed within each  
262 locus. For each study cohort, the lead SNP at each locus (*P*-value  $< 5 \times 10^{-8}$ ) together with  
263 other covariates were fitted in a linear regression model for each cytokine in the network. The  
264 resulting residuals were provided as an input for the multivariate test of the locus being  
265 assessed. The cohort-level conditional *P*-values were then combined in a meta-analysis. The  
266 stepwise conditional analysis was repeated in the univariate model with the lead multivariate  
267 SNPs until no additional significant signal was identified.

268

## 269 **Colocalisation analysis**

270 Bayesian colocalisation tests between cytokine network-associated signals and the following  
271 trait- and disease-associated signals were performed using the COLOC R package (45). For



272 whole blood *cis*-eQTLs, we downloaded publicly-available summary data from the eQTLGen  
273 Consortium portal (<http://www.eqtlgen.org/>). The eQTLGen Consortium analysis is the largest  
274 meta-analysis of blood eQTLs to date and comprises of 31,684 blood and PBMC samples from  
275 a total of 37 datasets (46). For immune cell *cis*-eQTLs, we either generated *cis*-eQTL summary  
276 data in resting B-cells (47), resting monocytes (48), and stimulated monocytes with interferon-  
277  $\gamma$  or lipopolysaccharide (48), or obtained publicly-available *cis*-eQTL summary data generated  
278 by the BLUEPRINT consortium in neutrophils and CD4<sup>+</sup> T-cells (49). For *cis*-eQTL mapping  
279 in B-cells and monocytes (resting and stimulated), information on accessing the raw gene  
280 expression and genotype data, data pre-processing, and *cis*-eQTL analysis has been described  
281 in a previous study (50). The BLUEPRINT immune cell summary statistics was downloaded  
282 from: [ftp://ftp.ebi.ac.uk/pub/databases/blueprint/blueprint\\_Epivar/](ftp://ftp.ebi.ac.uk/pub/databases/blueprint/blueprint_Epivar/). For protein QTLs, we used  
283 publicly-available SomaLogic plasma protein GWAS summary statistics from the INTERVAL  
284 study (17). For disease or complex trait associations, we compiled summary statistics of 185  
285 diseases and quantitative traits from GWAS studies conducted in  
286 European ancestry individuals, which were accessed from the UK biobank (**Table S10**), or  
287 downloaded from either ImmunoBase (<https://www.immunobase.org/>), the NHGRI-EBI  
288 GWAS Catalog (<https://www.ebi.ac.uk/gwas/>), or LD Hub (<http://ldsc.broadinstitute.org/>).  
289 Here, we only considered immune-related and cardiometabolic diseases. For each cytokine  
290 network locus, we only tested traits or diseases with the minimum association *P*-value  $< 1 \times$   
291  $10^{-6}$  at this locus. COLOC requires either beta-coefficients and its variance, or *P*-values, for  
292 each SNP, in addition to MAF and sample size. Since PLINK multivariate did not produce beta  
293 values and standard errors, we instead used meta-analysed *P*-values for the multivariate  
294 cytokine GWAS summary data. For each association pair assessed for colocalisation, SNPs  
295 within 200kb of the lead multivariate cytokine GWAS SNP were considered. COLOC  
296 (*coloc.abf*) was run with default parameters and priors. COLOC computed posterior  
297 probabilities for the following five hypotheses: PP0, no association with trait 1 (cytokine  
298 GWAS signal) or trait 2 (e.g. eQTL signal); PP1, association with trait 1 only (i.e. no  
299 association with trait 2); PP2, association with trait 2 only (i.e. no association with trait 1); PP3,  
300 association with trait 1 and trait 2 by two independent signals; PP4, association with trait 1 and  
301 trait 2 by shared variants. In practice, evidence of colocalisation were defined by  
302  $PP3 + PP4 \geq 0.99$  and  $PP4/PP3 \geq 5$ , a cut off previously suggested (50).

303

304

305

306

307

## 308 **Results**

### 309 **Summary of cohorts and data**

310 Our final dataset comprised a total of 9,267 individuals enrolled in three population-based  
311 studies, YFS07 (N=1,843), FINRISK97 (N=5,438), and FINRISK02 (N=1,986), all of whom  
312 had genome-wide genotype data and quantitative measurements of 18 cytokines (**Table S1**).  
313 Characteristics of the study cohorts are summarised in **Table 1**. Genotypes for the three  
314 datasets were imputed with IMPUTE2 (36) using the 1000 Genomes Phase 1 version 3 of the  
315 reference panel. After quality control, a total of 6,022,229 imputed and genotyped SNPs were  
316 available across all cohorts. Cytokine levels were measured in serum and plasma using Bio-  
317 Plex Pro™ Human Cytokine 27-plex and 21-plex assays, then subsequently normalised and  
318 adjusted for covariates including age, sex, BMI, pregnancy status, blood pressure lowering  
319 medication, lipid lowering medication, and population structure (**Methods**). An overview of  
320 the study is shown in **Figure 1**.

321

### 322 **A correlation network of circulating cytokines**

323 To characterise the correlation structure of circulating cytokines, we utilised the largest dataset  
324 available (FINRISK97) and the set of 18 cytokines overlapping all three cohorts. IL-18 was  
325 very weakly correlated with other cytokines (**Figure 2A**), while TRAIL, SCF, HGF, MCP-1,  
326 EOTAXIN and MIP-1b showed moderate correlation with the others. A distinct set of 11  
327 cytokines showed high correlation amongst themselves (median  $r=0.75$ ). In the smaller cohorts  
328 (YFS07 and FINRISK02), the cytokine correlation structure was similar but weaker (**Figure**  
329 **S1**), with the set of 11 cytokines also showing relatively high correlation (YFS07 median  
330  $r=0.42$ ; FINRISK02 median  $r=0.46$ ). We utilised this set of 11 cytokines (denoted below as the  
331 cytokine network) for multivariate association analysis.

332

333 The cytokine network included both anti-inflammatory (IL-10, IL-4, IL-6) and pro-  
334 inflammatory (IL-12, IFN- $\gamma$ , IL-17) cytokines as well as growth factors (FGF-basic, PDGF-  
335 BB, VEGF-A, G-CSF) and a chemokine (SDF-1a) involved in promoting leukocyte  
336 extravasation and wound healing (51–53). These cytokines were all positively correlated,  
337 which is likely indicative of counter-regulatory (negative-feedback) mechanisms amongst pro-  
338 inflammatory and anti-inflammatory pathways, such as that of IFN- $\gamma$  and IL-10 (54).

339

## 340 **Multivariate genome-wide association analysis for cytokine loci**

341 We performed a multivariate GWAS on the cytokine network in each cohort separately, then  
342 cohort-level results were combined using meta-analysis (**Methods**). Since one hypothesis test  
343 (corresponding to the cytokine network) was performed for each SNP, a genome-wide  
344 significance threshold of  $P < 5 \times 10^{-8}$  was used. Minimal inflation was observed for the cohort-  
345 level and meta-analysis test statistics with lambda ( $\lambda$ ) inflation ranging between 1.00-1.02  
346 (**Figure S2A – D**).

347

348 We identified 8 loci reaching genome-wide significance for the cytokine network (**Figure 2B**;  
349 **Table 2**). The strongest association was rs7767396 (meta- $P$ -value =  $6.93 \times 10^{-306}$ ), a SNP  
350 located 172kb downstream of vascular endothelial growth factor A (*VEGFA*) (**Figure S3A**).  
351 The *VEGFA* locus was previously identified in GWAS for individual cytokine levels including  
352 VEGF-A, IL-7, IL-10, IL-12, and IL-13 (14,19). Consistent with these earlier results, we found  
353 that VEGF-A, IL-10, and IL-12 were the top three cytokines based on their trait loadings  
354 (relative contribution of each cytokine to the multivariate association result) in each cohort and  
355 also significantly associated with this locus in the univariate scans (**Figure S4A**). Multivariate  
356 analysis also confirmed four other previously known associations (14,16,19), including loci  
357 harbouring *SERPINE2* (rs6722871; meta- $P$ -value =  $1.19 \times 10^{-59}$ ), *ZFPM2* (rs6993770; meta- $P$ -  
358 value =  $4.73 \times 10^{-8}$ ), *VLDLR* (rs7030781; meta- $P$ -value =  $3.78 \times 10^{-13}$ ), and *PCSK6*  
359 (rs11639051; meta- $P$ -value =  $1.93 \times 10^{-58}$ ) (**Figure 2B**; **Table 2**; **Figure S3B – E**). The  
360 cytokine with the highest loading at each of these loci was consistent with those previously  
361 identified in univariate analysis (**Figure S4B – E**).

362

363 The multivariate GWAS also detected novel cytokine associations not identified in any  
364 previous univariate tests of these cytokines. These were three loci with genic lead SNPs in the  
365 candidate genes *F5*, *PDGFRB*, and *ABO*. The lead variant at the *F5* locus (rs9332599; meta-  
366  $P$ -value =  $7.17 \times 10^{-12}$ ) is located in intron 12 of *F5* (**Figure S3F**). At the platelet-derived  
367 growth factor receptor-beta (*PDGFRB*) locus, the lead variant rs2304058 (meta- $P$ -value =  $4.06$   
368  $\times 10^{-9}$ ) is within intron 10 of *PDGFRB* (**Figure S3G**). At the *ABO* locus, the lead variant  
369 rs550057 (meta- $P$ -value =  $2.75 \times 10^{-8}$ ) is within the first intron of *ABO* (**Figure S3H**);  
370 furthermore, rs550057 is located ~1.6 kb upstream of the erythroid cell specific enhancer,  
371 which contains a GATA-1 transcription factor binding site and has been shown to enhance the  
372 transcription of the *ABO* gene (55).

373

374 To investigate the presence of multiple independently associated variants at each of the eight  
375 loci, we performed stepwise conditional multivariate meta-analysis. Three loci (*SERPINE2*,  
376 *VEGFA*, and *PCSK6*) exhibited evidence of multiple independent signals (**Table S2**). In  
377 addition to the lead variants (rs6722871, rs7767396, rs11639051) at each of these three loci,  
378 we identified additional association signals (rs55864163; *SERPINE2*, meta- $P_{cond} = 9.03 \times 10^{-29}$ ;  
379 rs112215592, *SERPINE2*, meta- $P_{cond} = 2.10 \times 10^{-12}$ ; rs4714729; *VEGFA*, meta- $P_{cond} = 7.49$   
380  $\times 10^{-10}$ ; rs6598475, *PCSK6*, meta- $P_{cond} = 2.63 \times 10^{-17}$ ), which were independently associated  
381 with the cytokine network. We also performed conditional univariate analysis that adjusted for  
382 the lead multivariate SNPs, which were either the same lead univariate SNPs or in high LD ( $r^2$   
383 = 0.99). This univariate analysis also uncovered the same secondary signal at the *VEGFA* locus  
384 in association with VEGFA cytokine levels (rs4714729; meta- $P_{cond} = 8.8 \times 10^{-13}$ ) (**Table S2**).

385

### 386 **Colocalisation of cytokine variants with *cis*-eQTLs in whole blood**

387 To characterise the regulatory effects of the multivariate cytokine-associated loci, we queried  
388 the largest publicly-available set of results for whole blood *cis*-eQTLs from a meta-analysis of  
389 31,684 individuals, which was obtained from the eQTLGen Consortium database (46). We  
390 found SNPs, lead or LD-proxy ( $r^2 > 0.5$ ), at seven of the eight cytokine loci (*ABO*, *F5*, *PCSK6*,  
391 *PDGFRB*, *SERPINE2*, *VEGFA*, *VLDLR*) with *cis*-regulatory effects ( $P$ -value  $< 1 \times 10^{-6}$ ) on  
392 gene expression (a total of 17 unique genes) in blood (**Table S3**). Using Bayesian  
393 colocalisation analysis, we further demonstrated that associations at three of these loci  
394 colocalised with *cis*-eQTLs for *ABO*, *PCSK6*, and *SERPINE2* expression (**Figure 3A – C**;  
395 **Table S4**).

396

### 397 **Colocalisation of cytokine variants with immune cell-specific *cis*-eQTLs**

398 Next, we investigated the cell type- or context-dependent regulatory effects of genetic variants  
399 associated with the cytokine network by interrogating previously published *cis*-eQTLs specific  
400 to resting B-cells (47), resting monocytes (48), stimulated monocytes with interferon- $\gamma$  or  
401 lipopolysaccharide (48), resting neutrophils (56), naive CD4<sup>+</sup> T-cells (49,56) and CD8<sup>+</sup> T-cells  
402 (49), all isolated from healthy donors of European ancestry (**Table S5**). Three out of the eight  
403 cytokine network loci harboured *cis*-eQTLs ( $P$ -value  $< 1 \times 10^{-6}$ ) in at least one immune cell  
404 type, in either stimulated or non-stimulated state (**Table S6**). For example, SNPs at the

405 *SERPINE2* locus were reported to have *cis*-eQTL effects across multiple immune cell types,  
406 including B-cells, CD4<sup>+</sup> and CD8<sup>+</sup> T-cells (**Table S6**).

407

408 Further, colocalisation analysis showed that the cytokine network variants at *SERPINE2* had  
409 strong evidence of sharing a causal variant with *SERPINE2 cis*-eQTLs in CD4<sup>+</sup> T-cells and B-  
410 cells, similar to the colocalisation we observe in whole blood (**Figure 3B**; **Table S7**).

411

### 412 **Colocalisation of cytokine variants with plasma protein QTLs**

413 To investigate protein-level effects of cytokine network variants, we utilised plasma protein  
414 QTLs (pQTLs) from the INTERVAL study (17). Colocalisation analysis, considering only  
415 pQTLs with association *P*-value <  $1 \times 10^{-6}$ , showed all the eight cytokine network loci had  
416 strong evidence of shared causal variants with plasma levels of a total of 146 proteins (out of  
417 the 215 tested) (**Table S8**). Of these, the *ABO* and *ZFPM* cytokine network loci strongly  
418 colocalised with pQTL signals for 55 (out of 81) and 87 (out of 98) proteins, respectively  
419 (**Table 3**; **Table S8**). Of these, 14 and 75 proteins shared the same causal lead pQTLs with the  
420 lead cytokine network variants at the *ABO* (rs550057) and *ZFPM2* (rs6993770) loci,  
421 respectively, suggesting these variants have widespread effects.

422

423 The *ABO* locus colocalised with pQTLs for several membrane proteins (B3GN2, endoglin,  
424 GOLM1, OX2G, TPST2) and cell surface receptors (IL-3RA, LIFR, IGF-I R, HGF receptor).  
425 *ABO* colocalisation was also observed with pQTLs for adhesion and immune-related molecules  
426 involved in leukocyte recruitment, cell adhesion, and transmigration, including sGP130,  
427 sICAM-1, sICAM-2, LIRB4, and P-selectin (**Table 3**; **Table S8**). At the *ZFPM2* locus,  
428 colocalisation was seen with pQTLs for proteins generally found in platelet granules (e.g.  
429 VEGFA, PDGF-AA, PDGF-BB, PDGF-D, angiopoietin, P-selectin). At the *SERPINE2* locus,  
430 we observed that in addition to colocalising with the *cis*-eQTL signal for *SERPINE2*  
431 expression, the cytokine network-associated variants colocalised with the *cis*-pQTL variants  
432 for *SERPINE2* protein levels (**Table S8**). Likewise, the *VEGFA* locus colocalised with a *cis*-  
433 pQTL for VEGFA, and the *PDGFRB* locus with a *cis*-pQTL for PDGFRB.

434

### 435 **Relationships of cytokine network variants with complex traits and diseases**

436 Using the NHGRI GWAS Catalog (57,58), we found that, across all eight cytokine network  
437 loci, 55 SNPs matched SNPs previously associated with quantitative traits and diseases. (**Table**  
438 **S9**). The lead cytokine network variant at *ZFPM2* (rs6993770) has previously been associated

439 with various platelet traits, including platelet count, distribution width, plateletcrit (total  
440 platelet mass) and mean volume (17,59) (**Table S9**).

441

442 Next, GWAS summary statistics from a broad range of traits and diseases (**Table S10**),  
443 including hematopoietic traits, circulating metabolites, immune- and cardiometabolic-related  
444 diseases were compiled for colocalisation analysis with the cytokine network loci. The two  
445 cytokine network-associated loci, *ABO* and *ZFPM2*, exhibited strong evidence of  
446 colocalisation for several traits and diseases. The *ZFPM2* locus not only colocalised with  
447 signals for several platelet trait associations, but also with other haematological trait-associated  
448 signals including white blood cell counts, and specifically neutrophil and basophil counts  
449 (**Table 3; Table S11**). The *ABO* locus showed colocalisation with various QTLs for  
450 haematological traits including red blood cell traits (haemoglobin concentration, red blood cell  
451 count, and hematocrit) and white blood cell counts, including granulocyte count and  
452 specifically eosinophil count (**Table 3; Table S11**). This is consistent with the *ABO* locus being  
453 identified as a pQTL for proteins involved in leukocyte activation as identified previously.  
454 Cytokine network variants at the *ABO* locus colocalised with those of intermediate density,  
455 low density, and very low-density lipoprotein subclasses as well as glycosylated haemoglobin  
456 (HbA1c) (**Table 3; Table S11**), suggesting both inflammatory and metabolic effects. Notably,  
457 the same cytokine network variants at the *ABO* locus also strongly colocalised with signals  
458 associated with coronary artery disease (CAD), pulmonary embolism, ischemic stroke, and  
459 type 2 diabetes (T2D) (**Table 3, Table S11**).

460

461

462

463

464

## 465 **Discussion**

466 In this study, we first identified a network of 11 correlated cytokines which are known to  
467 participate in a broad array of immune responses in circulation. These cytokines include those  
468 involved in the classical  $T_{H1}$  (IL-12, IFN- $\gamma$ ),  $T_{H2}$  (IL-4, IL-6, and IL-10),  $T_{H17}$  (IL-6, IL-17, and  
469 G-CSF), and  $T_{reg}$  (IL-10) responses (51,52) as well as the promotion of angiogenesis, tissue  
470 repair and remodelling typically coinciding with inflammatory and post-inflammatory states  
471 (VEGF-A, FGF-basic and PDGF-BB) (53). Although previous *in vitro* challenge studies  
472 (20,21) indicate antagonistic relationships amongst selected cytokines in the network, our

473 analyses in >9,000 individuals are consistent with previous study utilising similar data (19),  
474 showing that these 11 circulating cytokines are positively correlated in the general population.  
475 Therefore, at the population level, it is more likely that an equilibrium in circulating levels of  
476 disparate cytokines exists, possibly maintained by counter-regulatory mechanisms.

477

478 Our multivariate GWAS meta-analysis identified eight loci associated with the cytokine  
479 network; confirming six previously-reported associations for circulating cytokine levels  
480 (14,16,19) as well as uncovering two additional signals (*PDGFRB* and *ABO*), empirically  
481 demonstrating the statistical power of multivariate approaches. Further, integrative genetic  
482 analyses revealed evidence for shared genetic influences between these loci, molecular QTLs,  
483 and complex trait and disease associations. This study identified several regions harbouring  
484 cytokine-associated signals that colocalise with whole blood and/or immune cell-specific *cis*-  
485 eQTLs for a number of genes, including *SERPINE2*, *ABO*, and *PCSK6*, suggesting these genes  
486 are possible candidates underlying the collective expression of cytokines in the cytokine  
487 network – or vice versa. Our findings also highlight that the cytokine network associations at  
488 the pleiotropic loci, *ABO* and *ZFPM2*, overlap with signals associated with multiple traits,  
489 including cardiometabolic diseases, immune-related proteins, and platelet traits.

490

491 *SERPINE2* encodes protease nexin-1, an inhibitor of serine proteases such as thrombin and  
492 plasmin, and is therefore implicated in coagulation, fibrinolysis and tissue remodelling (60). It  
493 shares similar functions with its better-known homolog *SERPINE1*, or plasminogen activator  
494 inhibitor-1 (PAI-1), the elevation of which is associated with thrombosis and cardiovascular  
495 risk (60). However, there is also evidence that *SERPINE2* has pleiotropic roles in immune and  
496 inflammatory regulation, that could be either dependent or independent of its function as a  
497 serine protease. It is expressed in many tissue types, and its expression can be induced by pro-  
498 inflammatory cytokines such as IL-1 $\alpha$  (61,62). Conversely, *SERPINE2* can itself influence  
499 inflammatory status: *SERPINE2* is a candidate susceptibility gene for chronic obstructive  
500 pulmonary disease, and *SERPINE2*-knock-out mice exhibited extensive accumulation of  
501 lymphocytes in the lungs, through a mechanism linked to thrombin and NF $\kappa$ B activation (62).  
502 We observed in our data that the cytokine network associations overlapped with the *SERPINE2*  
503 pQTL signal. Moreover, using immune cell-specific *cis*-eQTL data, we further demonstrated  
504 colocalisation between the cytokine network and *SERPINE2* *cis*-eQTL signals specifically in  
505 CD4<sup>+</sup> T-cells and B-cells. This suggests that the association between *SERPINE2* and the  
506 cytokine network at this locus is at least partially-driven by lymphocytic expression –

507 consistent with *SERPINE2* itself influencing chemotaxis and recruitment of lymphocytes (62).  
508 Our analyses demonstrate that the importance of *SERPINE2* in regulating immune and  
509 inflammatory processes is potentially greater than previously anticipated, and warrants further  
510 targeted research.

511

512 Like *SERPINE2*, the *ABO* locus has widespread pleiotropic effects. The most well-known  
513 function of *ABO* is its determination of blood group. The human *ABO* gene has three major  
514 alleles (A, B, and O) that determine ABO blood type. The A and B alleles encode for distinct  
515 “A” versus “B” glycosyltransferases that add specific sugar residues to a precursor molecule  
516 (H antigen) to form A versus B antigens, respectively (63). The O allele results in a protein  
517 without glycosyltransferase activity (63). The lead cytokine-associated variant rs550057 and  
518 its proxies in moderate LD ( $r^2 = 0.6$ ; rs507666, rs687289) have been previously shown to  
519 determine the *ABO* allele (64), but they have also been associated with circulating levels of  
520 inflammatory proteins such sICAM-1, P-selectin, and ALP (17,65,66). Our study showed that  
521 cytokine network associations at the *ABO* locus share colocalised signals with a host of other  
522 proteins and traits, including lipoproteins (IDL, LDL, VLDL), proteins of immune function,  
523 immune cell subsets, and cardiometabolic diseases (**Table 3**), highlighting the potential for  
524 shared molecular etiology amongst these traits. Our analyses highlight the potential genetic  
525 basis for numerous previous observations linking ABO blood group to an array of similar traits  
526 and phenotypes (18,67–71).

527

528 It could therefore be speculated that the *ABO* gene influences the risk of cardiometabolic  
529 disease due to its involvement in multiple inflammatory, haemostatic and metabolic processes;  
530 however, our current understanding of the mechanisms behind this remains unclear. For  
531 instance, non-O blood groups have been associated with increased risk of both cardiovascular  
532 disease, venous thromboembolism, stroke, and T2D (68,72). However, the O blood group has  
533 itself been linked to elevated IL-10 and worse outcomes given existing coronary disease (risk  
534 of cardiovascular death, recurrent myocardial infarction and all-cause mortality) (64). Other  
535 studies have suggested a role for von Willebrand factor (VWF), a coagulative factor which also  
536 expresses ABO antigens – in particular, the O phenotype is associated with lower VWF, which  
537 may explain reduced thrombotic and cardiovascular risk (64,73). It has been suggested that the  
538 link between ABO blood group type and venous thromboembolism (VTE) is potentially driven  
539 by VWF and Factor VIII – non-O blood group individuals presented a higher risk of venous  
540 thromboembolism and had elevated levels of both VWF and Factor VIII (74,75). Also relevant



541 is the link between *ABO* and adhesion molecules such as E-selectin and sICAM-1 which are  
542 overexpressed in inflammatory states (18,66,70,71). sICAM-1 is a known positive correlate  
543 with cardiovascular disease; however, it is the A blood group, not O, that is associated with  
544 reduced sICAM-1 levels, again complicating the picture (70). Inferring the exact causal  
545 relationships amongst all these entities will require intricate follow-up experimental  
546 investigation, involving simultaneous examination of all key players. It is particularly unclear  
547 whether the link with cardiometabolic diseases may be due to its direct modification of H  
548 antigen, or on the glycosyltransferase activity of the encoded enzyme on other proteins, or  
549 some combination of both. In our study, formal causal inference (e.g. with Mendelian  
550 Randomisation) was not possible because the corresponding multivariate beta-coefficients and  
551 standard errors are not currently calculable and the locus itself has extensive pleiotropy.

552

553 The *ZFPM2* locus has been associated with platelet traits (59), and our findings highlight its  
554 importance as a determinant of platelet and angiogenic cytokine activity. *ZFPM2* encodes a  
555 zinc finger cofactor that regulates the activity of *GATA4*, a transcription factor reported to play  
556 a critical function not only in heart development (76) but also modulation of angiogenesis. In  
557 particular, *GATA4* directly binds to the promoter of angiogenic factor *VEGFA* and regulates  
558 its expression (77), and it has been shown that disruption of *ZFPM2*-*GATA4* interaction alters  
559 the expression of *VEGFA* and other angiogenesis-related genes (78). *VEGFA* and *PDGFR-BB*,  
560 which are part of the cytokine network, have been found to be released via alpha granules of  
561 activated platelets, and serum *VEGFA* levels correlate closely with blood platelet counts (79–  
562 81). In our study, we show that the cytokine-associated signal at the *ZFPM2* locus colocalised  
563 with GWAS signals for platelet traits and platelet proteins. The lead cytokine network SNP  
564 rs6993770 has been reported to be a *trans*-eQTL in whole blood for gene products typically  
565 found in platelets and their receptors (e.g. *CXCL5*, *GP9*, *MYL9*, *VWF*) (46). Collectively,  
566 these findings suggest that this locus regulates the number and/or cytokine activity of  
567 circulating platelets, and that this potentially occurs via interaction with *GATA4* and regulation  
568 of *VEGFA*.

569

570 In conclusion, our study illustrates the utility of multivariate analysis of correlated immune  
571 traits and highlights potentially fruitful avenues of biological investigation for multivariate  
572 genetic signals. Our results highlight that certain gene loci drive the expression of a cytokine  
573 network with immune, inflammatory and tissue repair functions; and, simultaneously, these  
574 loci are implicated in the regulation of other haemostatic and metabolic functions, with

575 relevance to human health and disease. This stresses the fact that the processes of inflammation,  
576 haemostasis and repair often run concurrent with each other after injury, and that biological  
577 systems often feature ample redundancy and feedback loops within individual effectors.

578

579

580

581

582

## 583 **Acknowledgements**

584 Artika Nath was supported by an Australian Postgraduate Award. This research was supported  
585 in part by the Victorian Government's OIS Program. Michael Inouye was supported by an  
586 NHMRC and Australian Heart Foundation Career Development Fellowship (no. 1061435).  
587 Gad Abraham was supported by an NHMRC Early Career Fellowship (no. 1090462). Qin Qin  
588 Huang is supported by the Melbourne International Research Scholarship. The Young Finns  
589 Study has been financially supported by the Academy of Finland: grants 286284, 134309  
590 (Eye), 126925, 121584, 124282, 129378 (Salve), 117787 (Gendi), and 41071 (Skidi); the  
591 Social Insurance Institution of Finland; Competitive State Research Financing of the Expert  
592 Responsibility area of Kuopio, Tampere and Turku University Hospitals (grant X51001); Juho  
593 Vainio Foundation; Paavo Nurmi Foundation; Finnish Foundation for Cardiovascular  
594 Research; Finnish Cultural Foundation; The Sigrid Juselius Foundation; Tampere Tuberculosis  
595 Foundation; Emil Aaltonen Foundation; Yrjö Jahnsson Foundation; Signe and Ane Gyllenberg  
596 Foundation; Diabetes Research Foundation of Finnish Diabetes Association; and EU Horizon  
597 2020 (grant 755320 for TAXINOMISIS); and European Research Council (grant 742927 for  
598 MULTIEPIGEN project); Tampere University Hospital Supporting Foundation. Peter Würtz  
599 is supported by the Novo Nordisk Foundation (15998) and Academy of Finland (312476 and  
600 312477).

## 601 References

- 602 1. Dinarello CA. Historical insights into cytokines. *Eur J Immunol.* 2007;37 Suppl 1:S34-  
603 45.
- 604 2. Vignali DA, Kuchroo VK. IL-12 family cytokines: immunological playmakers. *Nat*  
605 *Immunol.* 2012;13(8):722–8.
- 606 3. O’Shea JJ, Ma A, Lipsky P. Cytokines and autoimmunity. *Nat Rev Immunol.*  
607 2002;2(1):37–45.
- 608 4. Dranoff G. Cytokines in cancer pathogenesis and cancer therapy. *Nat Rev Cancer.*  
609 2004;4(1):11–22.
- 610 5. Ait-Oufella H, Taleb S, Mallat Z, Tedgui A. Recent advances on the role of cytokines  
611 in atherosclerosis. *Arter Thromb Vasc Biol.* 2011;31(5):969–79.
- 612 6. Kaptoge S, Seshasai SR, Gao P, Freitag DF, Butterworth AS, Borglykke A, et al.  
613 Inflammatory cytokines and risk of coronary heart disease: new prospective study and  
614 updated meta-analysis. *Eur Hear J.* 2014;35(9):578–89.
- 615 7. de Craen AJ, Posthuma D, Remarque EJ, van den Biggelaar AH, Westendorp RG,  
616 Boomsma DI. Heritability estimates of innate immunity: an extended twin study.  
617 *Genes Immun.* 2005;6(2):167–70.
- 618 8. Rafiq S, Stevens K, Hurst AJ, Murray A, Henley W, Weedon MN, et al. Common  
619 genetic variation in the gene encoding interleukin-1-receptor antagonist (IL-1RA) is  
620 associated with altered circulating IL-1RA levels. *Genes Immun.* 2007;8(4):344–51.
- 621 9. Interleukin 1 Genetics Consortium. Cardiometabolic effects of genetic upregulation of  
622 the interleukin 1 receptor antagonist: a Mendelian randomisation analysis. *Lancet*  
623 *Diabetes Endocrinol.* 2015;3(4):243–53.
- 624 10. Hollegaard M V, Bidwell JL. Cytokine gene polymorphism in human disease: on-line  
625 databases, supplement 3. *Genes Immun.* 2006;7(4):269–76.
- 626 11. Larsen MH, Albrechtsen A, Thørner LW, Werge T, Hansen T, Gether U, et al.  
627 Genome-wide association study of genetic variants in LPS-stimulated IL-6, IL-8, IL-  
628 10, IL-1ra and TNF- $\alpha$  cytokine response in a Danish cohort. *PLoS One.*  
629 2013;8(6):e66262.
- 630 12. Matteini AM, Li J, Lange EM, Tanaka T, Lange LA, Tracy RP, et al. Novel gene  
631 variants predict serum levels of the cytokines IL-18 and IL-1ra in older adults.  
632 *Cytokine.* 2014;65(1):10–6.
- 633 13. Ayele FT, Doumatey A, Huang H, Zhou J, Charles B, Erdos M, et al. Genome-wide  
634 associated loci influencing interleukin (IL)-10, IL-1Ra, and IL-6 levels in African  
635 Americans. *Immunogenetics.* 2012;64(5):351–9.
- 636 14. Debette S, Visvikis-Siest S, Chen MH, Ndiaye NC, Song C, Destefano A, et al.  
637 Identification of cis-and trans-acting genetic variants explaining up to half the  
638 variation in circulating vascular endothelial growth factor levels. *Circ Res.*  
639 2011;109(5):554–63.
- 640 15. He M, Cornelis MC, Kraft P, Van Dam RM, Sun Q, Laurie CC, et al. Genome-wide  
641 association study identifies variants at the IL18-BCO2 locus associated with  
642 interleukin-18 levels. *Arterioscler Thromb Vasc Biol.* 2010;30(4):885–90.
- 643 16. Choi SH, Ruggiero D, Sorice R, Song C, Nutile T, Vernon S, et al. Six novel loci  
644 associated with circulating VEGF levels identified by a meta-analysis of genome-wide  
645 association studies. *PLoS Genet.* 2016;12(2):e1005874.
- 646 17. Sun BB, Maranville JC, Peters JE, Stacey D, Staley JR, Blackshaw J, et al. Genomic  
647 atlas of the human plasma proteome. *Nature.* 2018;558(7708):73–9.
- 648 18. Sliz E, Kalaoja M, Ahola-Olli A, Raitakari O, Perola M, Salomaa V. Genome-wide  
649 association study identifies seven novel loci associating with circulating cytokines and  
650 cell adhesion molecules in Finns. *bioRxiv* 491852; doi:

- 651 <https://doi.org/10.1101/491852>.
- 652 19. Ahola-Olli A, Würtz P, Havulinna AS, Aalto K, Pitkänen N, Lehtimäki T, et al.  
653 Genome-wide association study identifies 17 new loci influencing concentrations of  
654 circulating cytokines and growth factors. *Am J Hum Genet.* 2017;100(1):40–50.
- 655 20. Li Y, Oosting M, Deelen P, Ricaño-Ponce I, Smeekens S, Jaeger M, et al. Inter-  
656 individual variability and genetic influences on cytokine responses to bacteria and  
657 fungi. *Nat Med.* 2016;22(8):952–60.
- 658 21. Li Y, Oosting M, Smeekens SP, Jaeger M, Aguirre-Gamboa R, Le KT, et al. A  
659 Functional Genomics Approach to Understand Variation in Cytokine Production in  
660 Humans. *Cell.* 2016;167(4):1099–110.
- 661 22. Ferreira MA, Purcell SM. A multivariate test of association. *Bioinformatics.*  
662 2009;25(1):132–3.
- 663 23. O’Reilly PF, Hoggart CJ, Pomyen Y, Calboli FCF, Elliott P, Jarvelin MR, et al.  
664 MultiPhen: joint model of multiple phenotypes can increase discovery in GWAS.  
665 *PLoS One.* 2012;7(5):e34861.
- 666 24. Zhou X, Stephens M. Efficient multivariate linear mixed model algorithms for  
667 genome-wide association studies. *Nat Methods.* 2014;11(4):407–9.
- 668 25. Turley P, Walters RK, Maghzian O, Okbay A, Lee JJ, Fontana MA, et al. Multi-trait  
669 analysis of genome-wide association summary statistics using MTAG. *Nat Genet.*  
670 2018;50(2):229–37.
- 671 26. Cichonska A, Rousu J, Marttinen P, Kangas AJ, Soininen P, Lehtimäki T. metaCCA:  
672 summary statistics-based multivariate meta-analysis of genome-wide association  
673 studies using canonical correlation analysis. *Bioinformatics.* 2016;32(13):1981–9.
- 674 27. Mägi R, Suleimanov YV, Clarke GM, Kaakinen M, Fischer K. SCOPA and META-  
675 SCOPA: software for the analysis and aggregation of genome-wide association studies  
676 of multiple correlated phenotypes. *BMC Bioinformatics.* 2017;18(1):25.
- 677 28. Yang Q, Wang Y. Methods for analyzing multivariate phenotypes in genetic  
678 association studies. *J Probab Stat.* 2012;2012:652569.
- 679 29. Kim S, Xing EP. Statistical estimation of correlated genome associations to a  
680 quantitative trait network. *PLoS Genet.* 2009;5(8):e1000587.
- 681 30. van der Sluis S, Posthuma D, Dolan CV. TATES: efficient multivariate genotype-  
682 phenotype analysis for genome-wide association studies. *PLoS Genet.*  
683 2013;9(1):e1003235.
- 684 31. Inouye M, Ripatti S, Kettunen J, Lytykäinen LP, Oksala N, Laurila PP, et al. Novel  
685 Loci for metabolic networks and multi-tissue expression studies reveal genes for  
686 atherosclerosis. *PLoS Genet.* 2012;8(8):e1002907.
- 687 32. Marttinen P, Pirinen M, Sarin AP, Gillberg J, Kettunen J, Surakka I, et al. Assessing  
688 multivariate gene-metabolome associations with rare variants using Bayesian reduced  
689 rank regression. *Bioinformatics.* 2014;30(14):2026–34.
- 690 33. Raitakari OT, Juonala M, Rönnemaa T, Keltikangas-Järvinen L, Räsänen L,  
691 Pietikäinen M, et al. Cohort profile: The cardiovascular risk in Young Finns Study. *Int*  
692 *J Epidemiol.* 2008;37(6):1220–6.
- 693 34. Borodulin K, Vartiainen E, Peltonen M, Jousilahti P, Juolevi A, Laatikainen T, et al.  
694 Forty-year trends in cardiovascular risk factors in Finland Katja. *Int J Epidemiol.*  
695 2015;39:1–8.
- 696 35. Teo YY, Inouye M, Small KS, Gwilliam R, Deloukas P, Kwiatkowski DP, et al. A  
697 genotype calling algorithm for the Illumina BeadArray platform. *Bioinformatics.*  
698 2007;23(20):2741–6.
- 699 36. Howie BN, Donnelly P, Marchini J. A flexible and accurate genotype imputation  
700 method for the next generation of genome-wide association studies. *PLoS Genet.*  
701 2009;5(6):e1000529.

- 702 37. Chang CC, Chow CC, Tellier LC, Vattikuti S, Purcell SM, Lee JJ. Second-generation  
703 PLINK: rising to the challenge of larger and richer datasets. *Gigascience*. 2015;4:7.
- 704 38. Abraham G, Inouye M. Fast principal component analysis of large-scale genome-wide  
705 data. *PLoS One*. 2014;9(4):e93766.
- 706 39. Josse J, Husson F. missMDA: A Package for Handling Missing Values in Multivariate  
707 Data Analysis. *J Stat Softw*. 2016;70(1):1–31.
- 708 40. Whitcomb BW, Schisterman EF. Assays with lower detection limits: Implications for  
709 epidemiological investigations. *Paediatr Perinat Epidemiol*. 2008;22(6):597–602.
- 710 41. Aulchenko YS, Ripke S, Isaacs A, van Duijn CM. GenABEL: An R library for  
711 genome-wide association analysis. *Bioinformatics*. 2007;23(10):1294–6.
- 712 42. Willer CJ, Li Y, Abecasis GR, Overall P. METAL : fast and efficient meta-analysis of  
713 genomewide association scans. *Bioinformatics*. 2010;26(17):2190–1.
- 714 43. Whitlock MC. Combining probability from independent tests: the weighted Z-method  
715 is superior to Fisher’s approach. *J Evol Biol*. 2005;18(5):1368–73.
- 716 44. Zaykin D V. Optimally weighted Z-test is a powerful method for combining  
717 probabilities in meta-analysis. *J Evol Biol*. 2011;24(8):1836–41.
- 718 45. Giambartolomei C, Vukcevic D, Schadt EE, Franke L, Hingorani AD, Wallace C, et  
719 al. Bayesian test for colocalisation between pairs of genetic association studies using  
720 summary statistics. *PLoS Genet*. 2014;10(5):e1004383.
- 721 46. Võsa U, Claringbould A, Westra H-J, Bonder MJ, Deelen P. Unraveling the polygenic  
722 architecture of complex traits using blood eQTL meta-analysis. *bioRxiv* 447367; doi:  
723 <https://doi.org/10.1101/447367>.
- 724 47. Fairfax BP, Makino S, Radhakrishnan J, Plant K. Genetics of gene expression in  
725 primary immune cells identifies cell type–specific master regulators and roles of HLA  
726 allele. *Nat Gen*. 2012;44(5):502–10.
- 727 48. Fairfax BP, Humburg P, Makino S, Naranbhai V, Wong D, Lau E, et al. Innate  
728 immune activity conditions the effect of regulatory variants upon monocyte gene  
729 expression. *Science*. 2014;343(6175):1246949.
- 730 49. Kasela S, Kisand K, Tserel L, Kaleviste E, Remm A, Fischer K, et al. Pathogenic  
731 implications for autoimmune mechanisms derived by comparative eQTL analysis of  
732 CD4+ versus CD8+ T cells. *PLoS Genet*. 2017;13(3):e1006643.
- 733 50. Guo H, Fortune MD, Burren OS, Schofield E 2, Todd JA, Wallace C. Integration of  
734 disease association and eQTL data using a Bayesian colocalisation approach highlights  
735 six candidate causal genes in immune-mediated diseases. *Hum Mol Genet*.  
736 2015;24(12):3305–13.
- 737 51. Zhu J, Paul W. Heterogeneity and plasticity of T helper cells. *Cell Res*. 2010;20(1):4–  
738 12.
- 739 52. Dong C. TH17 cells in development: an updated view of their molecular identity and  
740 genetic programming. *Nat Rev Immunol*. 2008;8(5):337–48.
- 741 53. Barrientos S, Brem H, Stojadinovic O, Tomic-Canic M. Clinical application of growth  
742 factors and cytokines in wound healing. *Wound Repair Regen*. 2014;22(5):569–78.
- 743 54. Hu X, Ivashkiv LB. Cross-regulation of signaling pathways by interferon-gamma:  
744 implications for immune responses and autoimmune diseases. *Immunity*.  
745 2009;31(4):539–50.
- 746 55. Sano R, Nakajima T, Takahashi K, Kubo R, Kominato Y, Tsukada J, et al. Expression  
747 of ABO blood-group genes is dependent upon an erythroid cell-specific regulatory  
748 element that is deleted in persons with the B(m) phenotype. *Blood*.  
749 2012;119(22):5301–10.
- 750 56. Chen L, Ge B, Casale FP, Vasquez L, Kwan T, Garrido-Martín D, et al. Genetic  
751 drivers of epigenetic and transcriptional variation in human immune cells. *Cell*.  
752 2016;167(5):398–1414.e24.

- 753 57. Welter D, MacArthur J, Morales J, Burdett T, Hall P, Junkins H, et al. The NHGRI  
754 GWAS Catalog, a curated resource of SNP-trait associations. *Nucleic Acids Res.*  
755 2014;42(Database issue):D1001–D1006.
- 756 58. MacArthur, Bowler E, Cerezo M, Gil L, Hall P, Hastings E, et al. The new NHGRI-  
757 EBI Catalog of published genome-wide association studies (GWAS Catalog). *Nucleic*  
758 *Acids Res.* 2017;45(Database issue):D896–D901.
- 759 59. Astle WJ, Elding H, Jiang T, Allen D, Ruklisa D, Mann AL, et al. The allelic  
760 landscape of human blood cell trait variation and links to common complex disease.  
761 *Cell.* 2016;67(5):1415–1429.e19.
- 762 60. Bouton M, Boulaftali Y, Richard B, Michel J. Emerging role of serpinE2 / protease  
763 nexin-1 in hemostasis and vascular biology. *Blood.* 2012;119(11):2452–7.
- 764 61. Santoro A, Conde J, Scotece M, Abella V, Lois A, Lopez V, et al. SERPINE2 inhibits  
765 IL-1 $\alpha$ -induced MMP-13 expression in human chondrocytes: Involvement of ERK/NF-  
766  $\kappa$ B/AP-1 pathways. *PLoS One.* 2015;10(8):e0135979.
- 767 62. Solleti SK, Srisuma S, Bhattacharya S, Rangel-Moreno J, Bijli KM, Randall TD, et al.  
768 Serpine2 deficiency results in lung lymphocyte accumulation and bronchus-associated  
769 lymphoid tissue formation. *FASEB J.* 2016;30(7):2615–26.
- 770 63. Yamamoto F, Cid E, Yamamoto M, Saitou N, Bertranpetit J, Blancher A. An  
771 integrative evolution theory of histo-blood group ABO and related genes. *Sci Rep.*  
772 2014;4:6601.
- 773 64. Johansson Å, Alfredsson J, Eriksson N, Wallentin L, Siegbahn A. Genome-wide  
774 association study identifies that the ABO blood group system influences interleukin-10  
775 levels and the risk of clinical events in patients with acute coronary syndrome. *PLoS*  
776 *One.* 2015;10(11):e0142518.
- 777 65. Masuda M, Okuda K, Ikeda DD, Hishigaki H, Fujiwara T. Interaction of genetic  
778 markers associated with serum alkaline phosphatase levels in the Japanese population.  
779 *Hum Genome Var.* 2015;2:15019.
- 780 66. Yao C, Chen G, Song C, Keefe J, Mendelson M, Huan T, et al. Genome-wide mapping  
781 of plasma protein QTLs identifies putatively causal genes and pathways for  
782 cardiovascular disease. *Nat Commun.* 2018;9(1):3268.
- 783 67. Meo SA, Rouq FA, Suraya F, Zaidi SZ. Association of ABO and Rh blood groups  
784 with type 2 diabetes mellitus. *Eur Rev Med Pharmacol Sci.* 2016;20(2):237–42.
- 785 68. Chen Z, Yang SH, Xu H, Li J. ABO blood group system and the coronary artery  
786 disease: an updated systematic review and meta-analysis. *Sci Rep.* 2016;6:23250.
- 787 69. Larson NB, Bell EJ, Decker PA, Pike M, Wassel CL, Tsai MY, et al. ABO blood  
788 group associations with markers of endothelial dysfunction in the Multi-Ethnic Study  
789 of Atherosclerosis. *Atherosclerosis.* 2016;251:422–9.
- 790 70. Paré G, Chasman DI, Kellogg M, Zee RY, Rifai N, Badola S, et al. Novel association  
791 of ABO histo-blood group antigen with soluble ICAM-1: results of a genome-wide  
792 association study of 6,578 women. *PLoS Genet.* 2008;4(7):e1000118.
- 793 71. Qi L, Cornelis MC, Kraft P, Jensen M, van Dam RM, Sun Q, et al. Genetic variants in  
794 ABO blood group region, plasma soluble E-selectin levels and risk of type 2 diabetes.  
795 *Hum Mol Genet.* 2010;19(9):1856–62.
- 796 72. Fagherazzi G, Gusto G, Clavel-Chapelon F, Balkau B, Bonnet F. ABO and Rhesus  
797 blood groups and risk of type 2 diabetes: evidence from the large E3N cohort study.  
798 *Diabetologia.* 2015;58(3):519–22.
- 799 73. O'Donnell J, Boulton FE, Manning RA, Laffan MA. Amount of H antigen expressed  
800 on circulating von Willebrand factor is modified by ABO blood group genotype and is  
801 a major determinant of plasma von Willebrand factor antigen levels. *Arter Thromb*  
802 *Vasc Biol.* 2002;22(2):335–41.
- 803 74. Tirado I, Mateo J, Soria JM, Oliver A, Martínez-Sánchez E, Vallvé C, et al. The ABO

- 804 blood group genotype and factor VIII levels as independent risk factors for venous  
805 thromboembolism. *Thromb Haemost.* 2005;93(3):468–74.
- 806 75. Schleef M, Strobel E, Dick A, Frank J, Schramm W, Spannagl M. Relationship  
807 between ABO and Secretor genotype with plasma levels of factor VIII and von  
808 Willebrand factor in thrombosis patients and control individuals. *Br J Haematol.*  
809 2005;128(1):100–7.
- 810 76. Svensson EC, Tufts RL, Polk CE, Leiden JM. Molecular cloning of FOG-2: a  
811 modulator of transcription factor GATA-4 in cardiomyocytes. *Proc Natl Acad Sci U S*  
812 *A.* 1999;96(3):956–61.
- 813 77. Heineke J, Auger-Messier M, Xu J, Oka T, Sargent MA, York A, et al. Cardiomyocyte  
814 GATA4 functions as a stress-responsive regulator of angiogenesis in the murine heart. *J*  
815 *Clin Invest.* 2007;117(11):3198–210.
- 816 78. Zhou B, Ma Q, Kong SW, Hu Y, Campbell PH, McGowan FX, et al. Fog2 is critical  
817 for cardiac function and maintenance of coronary vasculature in the adult mouse heart.  
818 *J Clin Invest.* 2009;119(6):1462–76.
- 819 79. Pal E, Korva M, Resman RK, Kejžar N, Bogovič P, Strle F, et al. Relationship  
820 between circulating vascular endothelial growth factor and its soluble receptor in  
821 patients with hemorrhagic fever with renal syndrome. *Emerg Microbes Infect.*  
822 2018;7(1):89.
- 823 80. Banks RE, Forbes MA, Kinsey SE, Stanley A, Ingham E, Walters C, et al. Release of  
824 the angiogenic cytokine vascular endothelial growth factor (VEGF) from platelets:  
825 significance for VEGF measurements and cancer biology. *Br J Cancer.*  
826 1998;77(6):956–64.
- 827 81. Graff J, Klinkhardt U, Schini-Kerth VB, Harder S, Franz N, Bassus S, et al. Close  
828 relationship between the platelet activation marker CD62 and the granular release of  
829 platelet-derived growth factor. *J Pharmacol Exp Ther.* 2002;300(3):952–7.
- 830

## 831 **Figures**

832 **Figure 1: Overview of the study populations, design, and the analyses conducted.**

833

834

835 **Figure 2: Multivariate GWA analysis of a network of 11 correlated cytokines in three**

836 **Finnish cohorts. (A)** Correlation heatmap of the 18 cytokines in the FINRISK97 cohort. Each

837 cell presents the pair-wise Pearson's correlation coefficient between the normalised cytokine

838 residuals. The cytokines are ordered by hierarchical clustering, using 1 minus the absolute

839 value of the correlations as the distance matrix. The colour scale denotes the strength of the

840 correlations, where red is a high positive correlation. The group of 11 tightly correlated

841 cytokines (black box) was used for multivariate analysis. **(B)** Manhattan plot for meta-analysis

842 results from the multivariate GWAS of the cytokine network. The statistical strength of

843 association ( $-\log_{10}$  meta- $P$ -value;  $y$ -axis) is plotted against all the SNPs ordered by

844 chromosomal position ( $x$ -axis). The sky-blue horizontal dashed line represents the genome-

845 wide (meta- $P$ -value  $< 5 \times 10^{-8}$ ) significance threshold. The lead SNP (lowest meta- $P$ -value) at

846 each locus and the nearby genes are shown.

847

848 **Figure 3: Regional plots for the cytokine network association, and whole blood and**

849 **immune cell *cis*-eQTL association signals at the *ABO*, *PCSK6* and *SERPINE2* locus. (A)**

850 The cytokine network GWAS signal (top) colocalises with the whole blood *cis*-eQTLs signal

851 for *ABO* (bottom) at the *ABO* locus on chromosome 9; **(B)** colocalises with whole blood *cis*-

852 eQTLs for *PCSK6* expression (bottom) at the *PCSK6* locus on chromosome 15; **(C)** colocalises

853 with the *cis*-eQTL signals for *SERPINE2* expression in whole blood (middle), B-cells (middle),

854 and CD4<sup>+</sup> T-cells (bottom) at the *SERPINE2* locus on chromosome 2. For each plot, the circles

855 represent the  $-\log_{10}$  association  $P$ -values ( $y$ -axis) of SNPs plotted against their chromosomal

856 position ( $x$ -axis). The eQTL association plots show the lead cytokine network GWAS SNP

857 tested in the colocalisation analysis. The lead cytokine network GWAS SNP rs6722871 was

858 not present in the B-cell and CD4<sup>+</sup> T cell eQTL dataset, instead, the next top GWAS SNP

859 present in each of the eQTL dataset (rs861442, B-cell; rs1438831, CD4<sup>+</sup> T-cell) is shown. For

860 all regional plots, pairwise LD ( $r^2$ ) in the region is coloured with respect to the lead cytokine

861 network GWAS SNP. LD was calculated from the 1000 Genomes European population.

862



863 **Tables**

864

865 **Table 1: Summary of descriptive characteristics of the three study cohorts.**

| <b>Characteristics</b>                                      | <b>FINRISK97</b> | <b>FINRISK02</b> | <b>YFS07</b>   |
|-------------------------------------------------------------|------------------|------------------|----------------|
| Collection year                                             | 1997             | 2002             | 2007           |
| Number of individuals with matched cytokine & genotype data | 5438             | 1986             | 1843           |
| Number of males (%)                                         | 2637 (48.5)      | 991(49.9)        | 841 (45.6)     |
| Mean age in years (and range)                               | 47.6 (24-74)     | 60.3(51-74)      | 37.7 (30-45)   |
| BMI (kg/m <sup>2</sup> ); mean $\pm$ SD                     | 26.6 $\pm$ 4.6   | 28.1 $\pm$ 4.5   | 25.9 $\pm$ 4.6 |
| Number of individuals on lipid lowering drugs (%)           | 174 (3.2)        | 284 (14.3)       | 40 (2.2)       |
| Number of individuals on blood pressure treatment drugs (%) | 698 (12.8)       | 512 (25.8)       | 127 (6.9)      |

866 Abbreviations: BMI, body mass index; YFS, Young Finns Study. The numbers beside the  
867 cohort names refer to the calendar year (collection year) in which the samples and clinical  
868 information were obtained from each cohort.

869 **Table 2: Meta-analysed results of multivariate GWAS of cytokine network**

| Locus           | Locus Region | Top SNP    | Average MAF | Top Multivariate Meta- <i>P</i> -value | Univariate Meta- <i>P</i> -value (Top Cytokine) | Detection    |
|-----------------|--------------|------------|-------------|----------------------------------------|-------------------------------------------------|--------------|
| <i>F5</i>       | 1q24.2       | rs9332599  | 0.294       | $7.17 \times 10^{-12}$                 | $9.21 \times 10^{-3}$<br>(SDF1a)                | Multivariate |
| <i>SERPINE2</i> | 2q36.1       | rs6722871  | 0.311       | $1.19 \times 10^{-59}$                 | $3.55 \times 10^{-18}$<br>(PDGF-BB)             | Both         |
| <i>PDGFRB</i>   | 5q32         | rs2304058  | 0.379       | $4.06 \times 10^{-9}$                  | $1.52 \times 10^{-5}$<br>(IL4)                  | Multivariate |
| <i>VEGFA</i>    | 6p21.1       | rs7767396  | 0.471       | $6.93 \times 10^{-306}$                | $3.10 \times 10^{-201}$<br>(VEGF-A)             | Both         |
| <i>ZFPM2</i>    | 8q23.1       | rs6993770  | 0.221       | $4.73 \times 10^{-8}$                  | $1.01 \times 10^{-7}$<br>(IL12p70)              | Multivariate |
| <i>ABO</i>      | 9q34.2       | rs550057   | 0.306       | $2.75 \times 10^{-8}$                  | $4.9 \times 10^{-3}$<br>(IL4)                   | Multivariate |
| <i>VLDLR</i>    | 9p24.2       | rs7030781  | 0.413       | $3.78 \times 10^{-13}$                 | $6.78 \times 10^{-14}$<br>(VEGF-A)              | Both         |
| <i>PCSK6</i>    | 15q26.3      | rs11639051 | 0.255       | $1.93 \times 10^{-58}$                 | $1.19 \times 10^{-26}$<br>(PDGF-BB)             | Both         |
| <i>JMJD1C</i>   | 10q21.3      | rs9787438  | 0.374       | * $1.30 \times 10^{-7}$                | * $8.96 \times 10^{-12}$<br>(VEGFA)             | Univariate   |

870 The table shows the meta-analysis *P*-values for the top SNP (lowest *P*-value) at each locus  
871 associated with the cytokine network in the multivariate analysis at genome-wide significance  
872 threshold ( $5 \times 10^{-8}$ ). The corresponding lowest meta-*P*-value for the same top SNP in the  
873 univariate analysis with any single cytokine present in the cytokine network, given in brackets  
874 beside the meta-*P*-value, was also reported. \*Instance where the top SNP at a locus crossed  
875 only the univariate significance threshold ( $P < 4.55 \times 10^{-9}$ ), then the corresponding meta-*P*-  
876 value for that SNP in the multivariate was also given. The univariate significance threshold was  
877 calculated from a Bonferroni correction for 11 cytokines tested ( $5 \times 10^{-8}/11$ ).  
878

879 **Table 3: Colocalisation of cytokine network-associated variants at the *ABO* and *ZFPM2* loci with those of plasma protein levels,**  
880 **quantitative traits, and disease risk.** Evidence: evidence of colocalisation; Strong:  $PP3+PP4 > 0.99$  and  $PP4/PP3 > 5$ ; Suggestive:  $PP3 + PP4 >$   
881  $0.75$  and  $PP4/PP3 > 3$ ; None: association signal for the trait at the locus, but no evidence of colocalisation.

| <b>ABO locus (Chromosome 9)</b> |                                     |                                           |                                                                                                                                                                                                                                                                                                                                                                                                                                                                                                           |
|---------------------------------|-------------------------------------|-------------------------------------------|-----------------------------------------------------------------------------------------------------------------------------------------------------------------------------------------------------------------------------------------------------------------------------------------------------------------------------------------------------------------------------------------------------------------------------------------------------------------------------------------------------------|
| <b>Traits/<br/>Diseases</b>     | <b>Group/ Functions</b>             | <b>Evidence</b>                           | <b>Names</b>                                                                                                                                                                                                                                                                                                                                                                                                                                                                                              |
| <b>Diseases</b>                 | Cardiometabolic diseases            | Strong                                    | Pulmonary embolism, ischemic stroke, coronary artery disease, type 2 disease,                                                                                                                                                                                                                                                                                                                                                                                                                             |
|                                 |                                     | None                                      | Deep vein thrombosis                                                                                                                                                                                                                                                                                                                                                                                                                                                                                      |
| <b>Blood cell traits</b>        | Blood cell counts                   | Strong                                    | White blood cell, granulocytes, basophils + eosinophils, basophils + neutrophils, eosinophils + neutrophils, eosinophils, neutrophils, haematocrit (%), haemoglobin, myeloid, red blood cells, platelet distribution width                                                                                                                                                                                                                                                                                |
|                                 |                                     | Suggestive                                | Basophils, reticulocytes                                                                                                                                                                                                                                                                                                                                                                                                                                                                                  |
|                                 |                                     | None                                      | Monocyte, platelet, plateletcrit (%), red cell distribution width                                                                                                                                                                                                                                                                                                                                                                                                                                         |
| <b>Metabolites</b>              | IDL particle constituents           | Strong                                    | Total cholesterol (IDL-C), free cholesterol (IDL-FC), total lipids (IDL-L), total particle concentration (IDL-P), phospholipids (IDL-PL), triglycerides (IDL-TG)                                                                                                                                                                                                                                                                                                                                          |
|                                 | LDL subclass particle constituents  | Strong                                    | For large particles: total cholesterol (L-LDL-C), cholesterol esters (L-LDL-CE), free cholesterol (L-LDL-FC), total lipids (L-LDL-L), total particle concentration (L-LDL-P), phospholipids (L-LDL-PL),<br>For medium particles: total cholesterol (M-LDL-C), cholesterol esters (M-LDL-CE), total lipids (M-LDL-L), total particle concentration (M-LDL-P), phospholipids (M-LDL-PL)<br>For small particles: total cholesterol (S-LDL-C), total lipids (S-LDL-L), total particle concentration (S-LDL-P) |
|                                 | VLDL subclass particle constituents | Strong                                    | For small particles: total cholesterol (S-VLDL-C),<br>For extra-small particles: total lipids (XS-VLDL-L), phospholipids (XS-VLDL-PL)                                                                                                                                                                                                                                                                                                                                                                     |
|                                 | Other                               | Strong                                    | HbA1c, Apolipoprotein B, total LDL cholesterol, total serum cholesterol                                                                                                                                                                                                                                                                                                                                                                                                                                   |
| <b>Proteins</b>                 | Chemokine activity                  | Strong                                    | FAM3B, FAM3D, MIP-5, TECK,                                                                                                                                                                                                                                                                                                                                                                                                                                                                                |
|                                 |                                     | Suggestive                                | CCL28                                                                                                                                                                                                                                                                                                                                                                                                                                                                                                     |
|                                 | Chemokine receptors                 | Strong                                    | IL-3RA, HGF receptor, sGP130, VEGF-R2, VEGF-R3                                                                                                                                                                                                                                                                                                                                                                                                                                                            |
|                                 |                                     | None                                      | TCCR                                                                                                                                                                                                                                                                                                                                                                                                                                                                                                      |
|                                 | Receptor function and/or signalling | Strong                                    | F177A, GP116, IGF-1R, IR, JAG1, MBL, PEAR1, PYY, SECTM1, SEMA6A, TLR4                                                                                                                                                                                                                                                                                                                                                                                                                                     |
|                                 |                                     | Suggestive                                | PLXB2                                                                                                                                                                                                                                                                                                                                                                                                                                                                                                     |
|                                 |                                     | None                                      | CD109, CD209, GFRAL, GPIV, LIF-R, Notch-1, PEAR1, sTIE1, sTIE2                                                                                                                                                                                                                                                                                                                                                                                                                                            |
|                                 | Cell adhesion                       | Strong                                    | Cadherin-1, E-selectin, Endoglin, ICAM-4, ISLR2, Laminin, NCAM-L1, OX2G, P-selectin, sICAM-1, sICAM-2, sICAM-5                                                                                                                                                                                                                                                                                                                                                                                            |
|                                 |                                     | None                                      | ADAM23, BCAM, Cadherin-5, Desmoglein-2, ESAM                                                                                                                                                                                                                                                                                                                                                                                                                                                              |
|                                 | Enzyme function                     | Strong                                    | B3GN2, B4GT1, B4GT2, Cathepsin-S, CLIC5, DPEP2, FA20B, FUT10, GLCE, GNS, IAP, LPH, MA1A2, NDST1, QSOX2, ST4S6, TPST2, XXLT1                                                                                                                                                                                                                                                                                                                                                                               |
| None                            |                                     | ATS13, BGAT, CEL, CHSTB, DYR, MINP1, TLL1 |                                                                                                                                                                                                                                                                                                                                                                                                                                                                                                           |
| Miscellaneous                   | Strong                              | C1GLC, CASC4, GOLM1, KIN17, THSD1, TUFT1, |                                                                                                                                                                                                                                                                                                                                                                                                                                                                                                           |
|                                 | None                                | Factor VIII, OBP2B                        |                                                                                                                                                                                                                                                                                                                                                                                                                                                                                                           |

| <b>ZFPM2 locus (Chromosome 8)</b> |                                     |                                                                                                                               |                                                                                                                                                                                                      |
|-----------------------------------|-------------------------------------|-------------------------------------------------------------------------------------------------------------------------------|------------------------------------------------------------------------------------------------------------------------------------------------------------------------------------------------------|
| <b>Traits/<br/>Diseases</b>       | <b>Group/ Functions</b>             | <b>Evidence</b>                                                                                                               | <b>Names</b>                                                                                                                                                                                         |
| <b>Blood cell traits</b>          | Blood cell counts                   | Strong                                                                                                                        | White blood cells, granulocytes, basophils + neutrophils, neutrophils + eosinophils, basophils, neutrophils, myeloid, platelets, plateletcrit (%), platelet distribution width, mean platelet volume |
| <b>Proteins</b>                   | Cytokine/chemokine activity         | Strong                                                                                                                        | EDA, IL-7, PDGF-AA, PDGF-BB, PDGF-D, VEGF-A, NAP-2, RANTES, TARC                                                                                                                                     |
|                                   | Immune response                     | Strong                                                                                                                        | CLM2, COCH, CYTF, DB119                                                                                                                                                                              |
|                                   | Receptor function and/or signalling | Strong                                                                                                                        | ANG-1, APP, BDNF, CD44, CGB2, CRIM1, Dkk-1, Dkk-4, EDAR, EPHB2, EPHB3, GI24, GRP, LIRB4, Mammaglobin-2, OBP2A, P2RX6, PAP1, PTPRD, RGS10, RGS3, RHOG, THA, MESD2                                     |
|                                   |                                     | Suggestive                                                                                                                    | Ephrin-A3                                                                                                                                                                                            |
|                                   |                                     | None                                                                                                                          | UNC5H4, sRAGE                                                                                                                                                                                        |
|                                   | Cell adhesion                       | Strong                                                                                                                        | Galectin-7, KIRR2, MAdCAM-1, MFGM, ON, P-Selectin, PCDG8, SCF, SPARCL1, ( <i>CDHR3, OBCAM</i> )                                                                                                      |
|                                   | Enzyme activity                     | Strong                                                                                                                        | Arylsulfatase A, ASM3A, B4GT7, Cathepsin A, CHSTB, CPXM1, FUT8, GSTM1-1, INP5E, MMEL2, MYSM1, PAI-1, PDIA5, RIFK, SIRT5, SPTC1, UD2A1                                                                |
|                                   |                                     | None                                                                                                                          | PDE3A, ZFP91, LAML2, HECW1                                                                                                                                                                           |
|                                   | Enzyme inhibitor                    | Strong                                                                                                                        | SERPINE2, SPINK5, TICN3, WFD13                                                                                                                                                                       |
|                                   | Transcription/translation           | Strong                                                                                                                        | APBB1, CENPW, HIF-1a, PAIP1                                                                                                                                                                          |
| Suggestive                        |                                     | ID2                                                                                                                           |                                                                                                                                                                                                      |
| Miscellaneous                     | Strong                              | 4EBP2, APLP2, ARL1, ASIC4, CA063, Coactosin-like protein, CQ089, DJB11, MPP7, NSG2, PROL1, RBM28, SATB1, SYT11, SYT17, TXNDC4 |                                                                                                                                                                                                      |
|                                   | None                                | CNA2                                                                                                                          |                                                                                                                                                                                                      |

883 Refer to Table S8 for full descriptions of the proteins.

884 **Figures**

885

886

887 **Figure 1: Overview of the study populations, design, and the analyses conducted.**

888

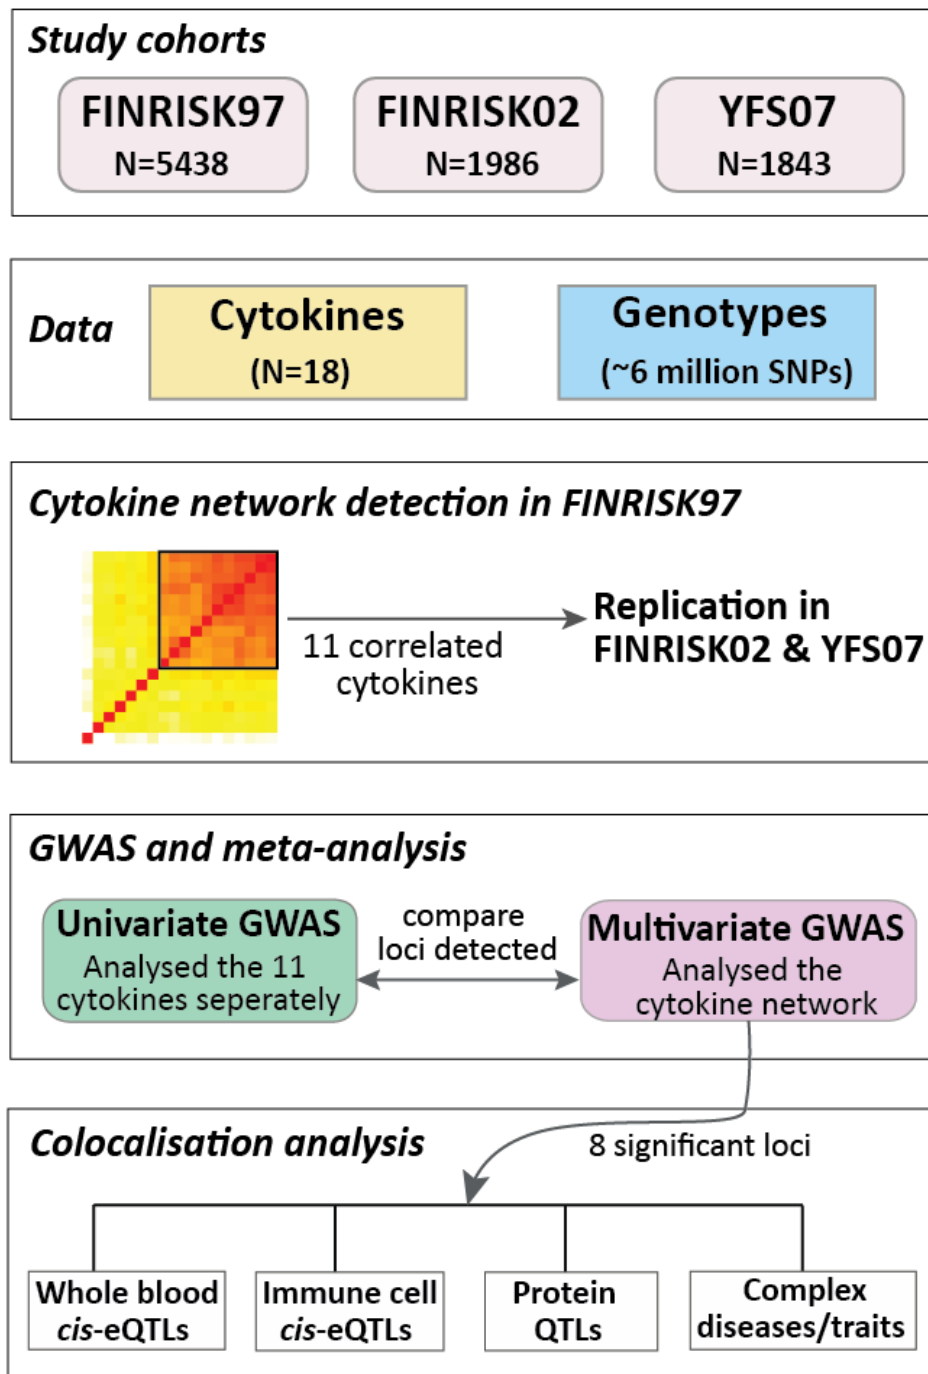

929

928

930 **Figure 2: Multivariate GWA analysis of a network of 11 correlated cytokines in three**  
931 **Finnish cohorts**  
932

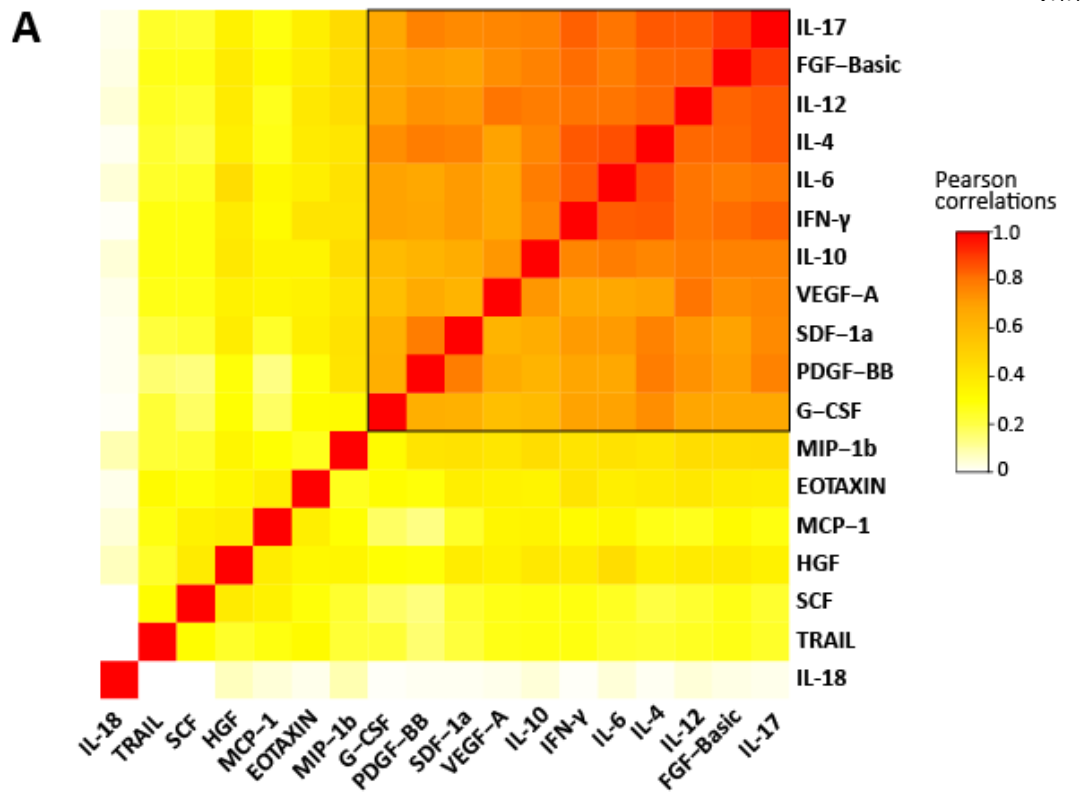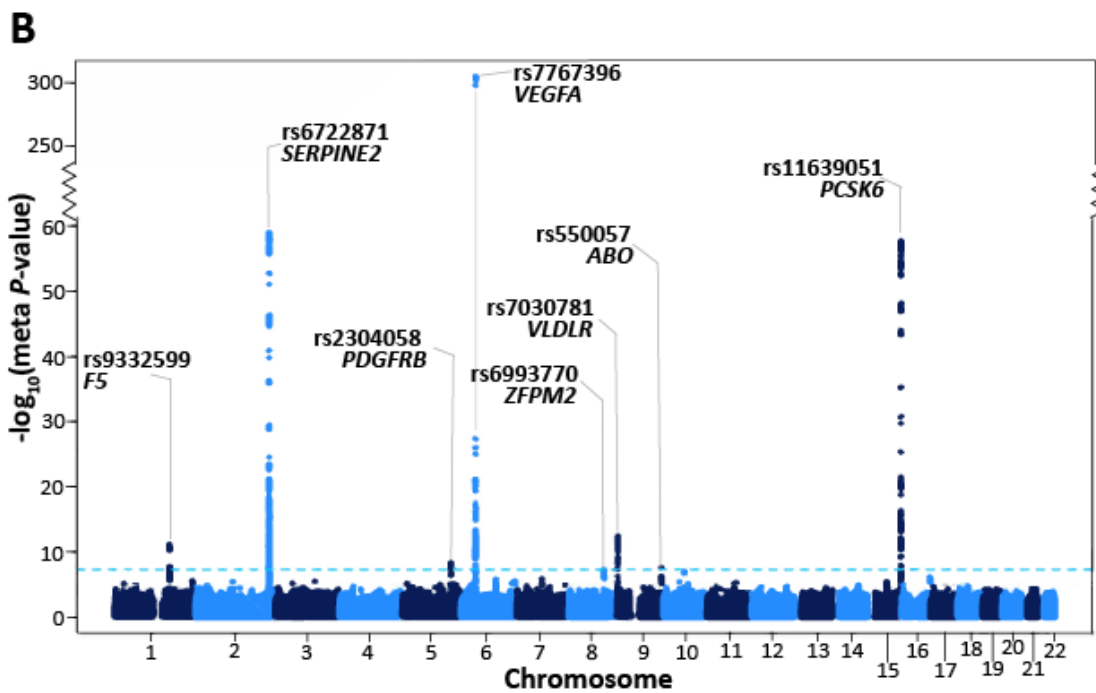

975

976 **Figure 3: Cytokine network-associated loci colocalise with whole blood and immune cell**  
977 ***cis*-eQTLs**  
978

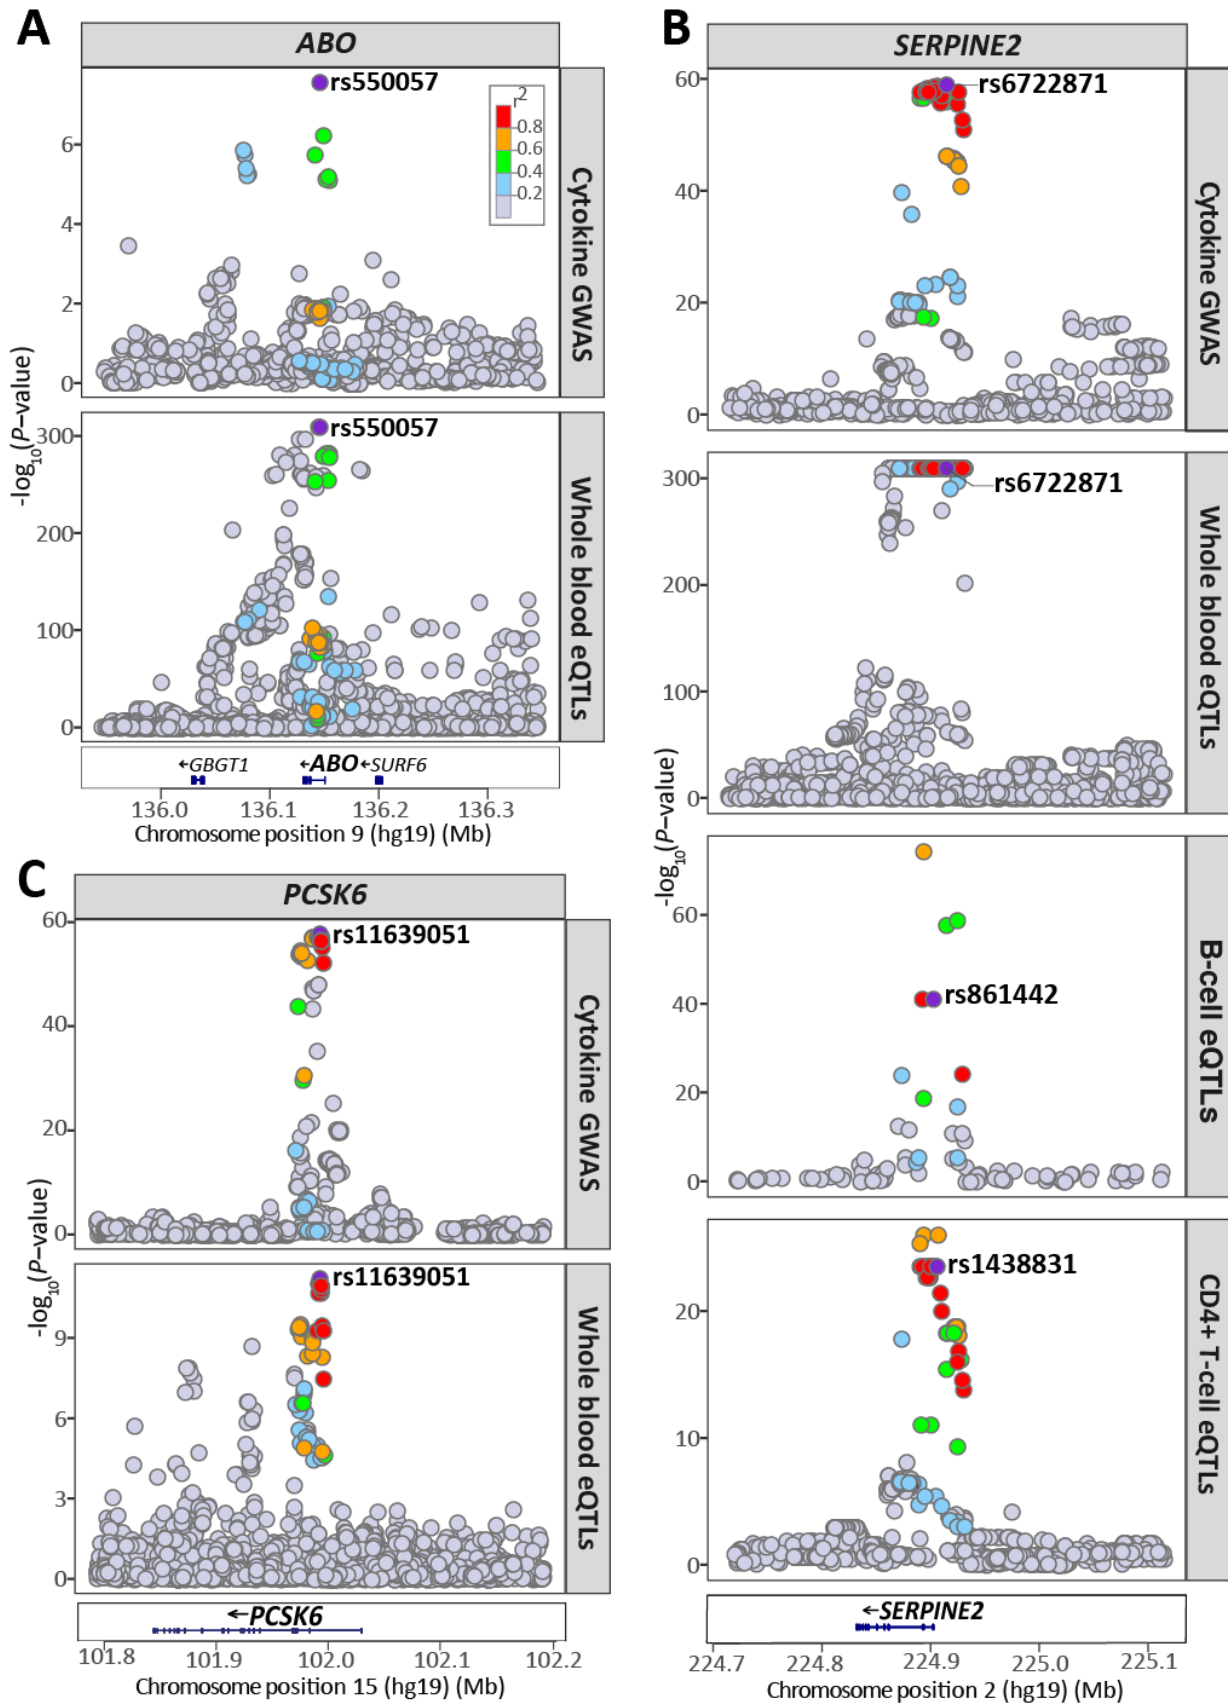

Source: https://www.biorxiv.org/content/10.1101/544445v1.full.pdf
